# Supplementary material for: Hierarchical Cell Death Program Disrupts the Intracellular Niche Required for Burkholderia thailandensis Pathogenesis
Source: PubMed Central journal article supplement (PMC8262894; doi:10.1128/mbio.01059-21), 2021-06-22

*B. thailandensis*

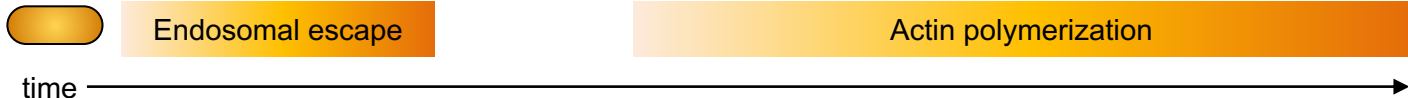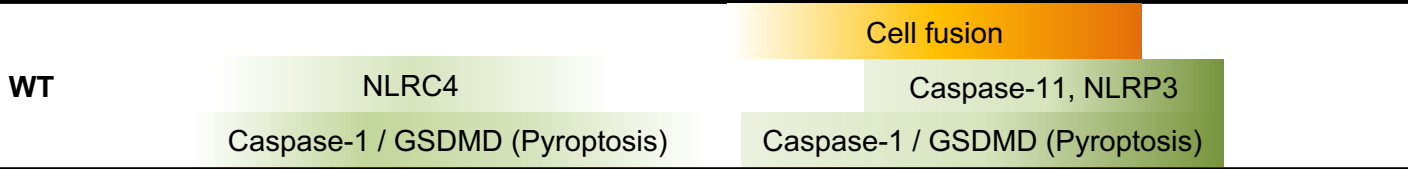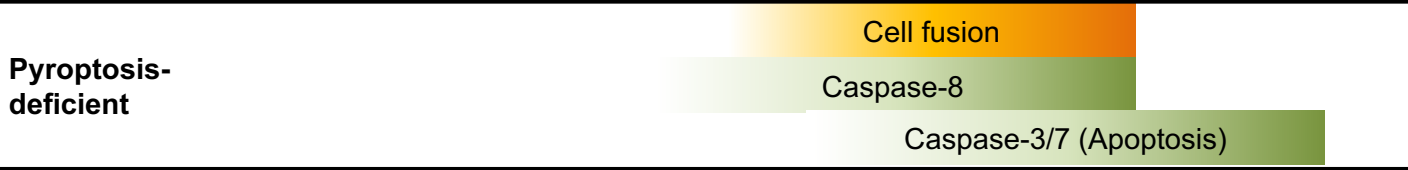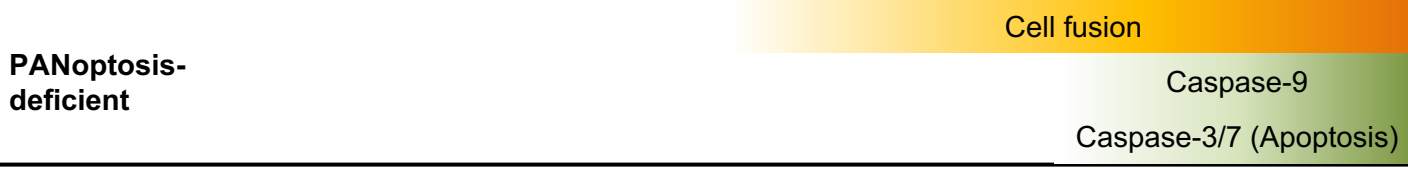

Supplement: mbio.01059-21-sf004.pdf [file mbio.01059-21-sf004.pdf]
